# Supplementary material
Source: PubMed Central journal article supplement (PMC9986124)
Supplement: mmc1.pdf [file mmc1.pdf]

**Cell Reports, Volume 42**

**Supplemental information**

**Design of a stabilized RBD enables  
potently neutralizing SARS-CoV-2  
single-component nanoparticle vaccines**

**Thayne H. Dickey, Rui Ma, Sachy Orr-Gonzalez, Tarik Ouahes, Palak Patel, Holly McAleese, Brandi Butler, Elizabeth Eudy, Brett Eaton, Michael Murphy, Jennifer L. Kwan, Nichole D. Salinas, Michael R. Holbrook, Lynn E. Lambert, and Niraj H. Tolia**

## Supplemental Information

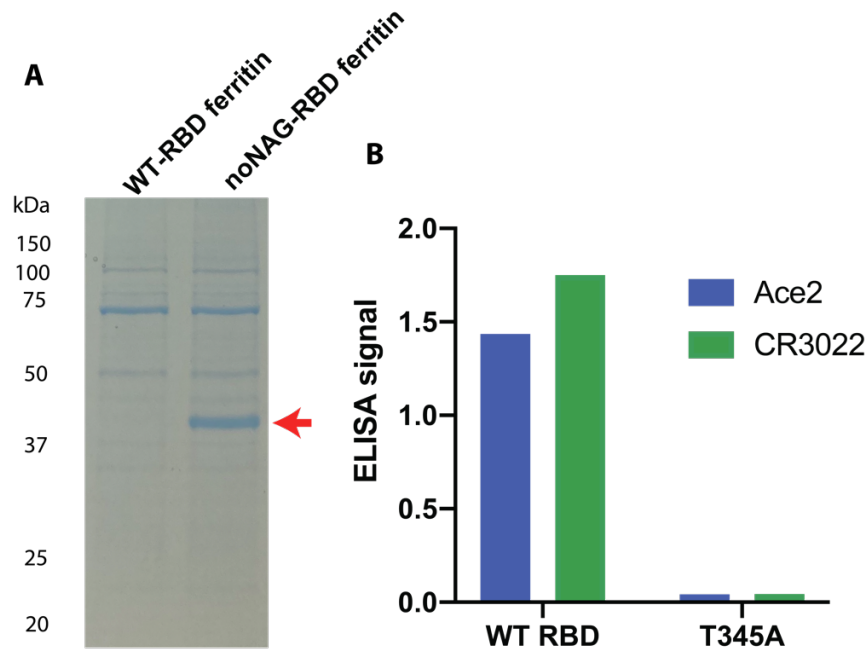

**Figure S1. WT-RBD expresses poorly as a nanoparticle or non-glycosylated monomer.** (A) Expi293F cell-free supernatant after 4 days expression analyzed by SDS-Page. Arrow indicates noNAG-RBD-ferritin fusion protein. (B) ELISA expression screen of cell-free supernatant using Ace2 and CR3022. WT-RBD has high expression and reacts with probes while the non-glycosylated T345A mutant does not.

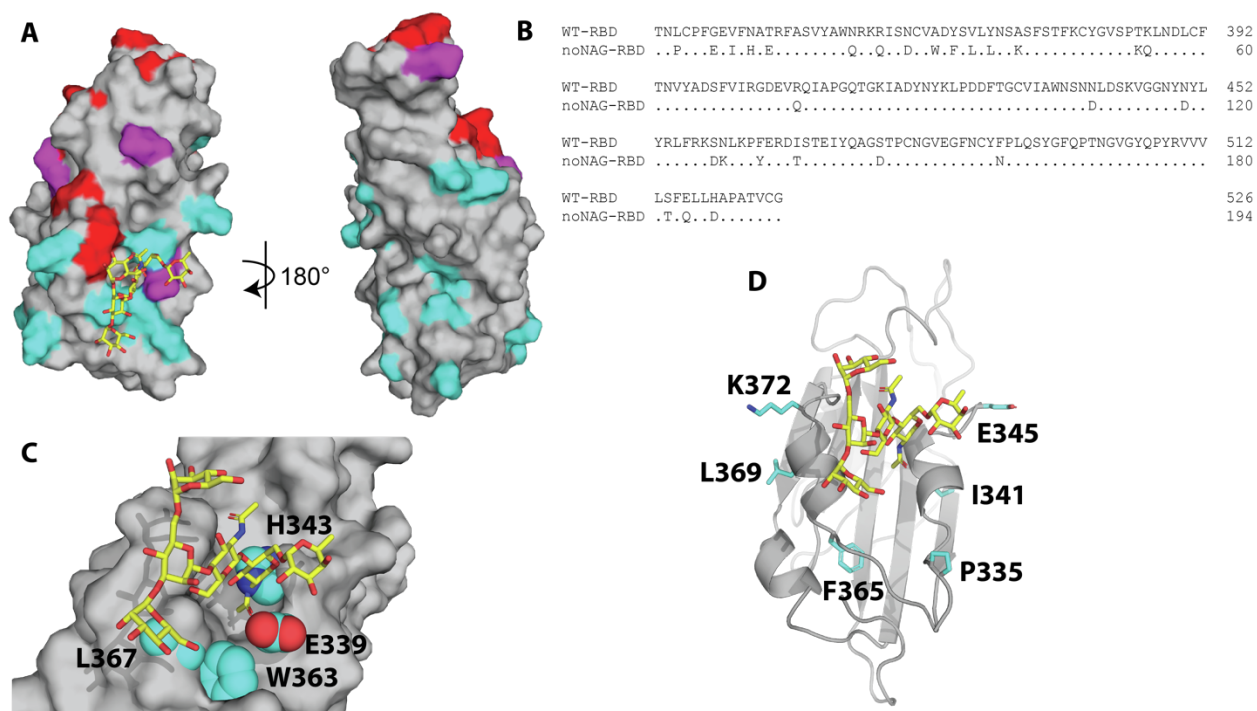

**Figure S2. noNAG-RBD amino acid changes.** (A) Amino acid changes mapped onto a model of noNAG-RBD. noNAG-RBD changes are indicated in cyan, omicron BA.5 changes are red, overlapping changes are magenta (G339[D]/E, R408[S]/Q, N440[K]/D, S477[N]/D, where the omicron identity is in brackets). The N-glycan is shown as a yellow sticks colored by element. (B) Sequence alignment indicating the location of amino acid changes in noNAG-RBD. (C) Cavity-filling amino acid changes G339E, N343H, A363W, V367L (cyan spheres) likely stabilize noNAG-RBD by compensating for stabilizing interactions lost upon removal of the glycan at position 343 (yellow sticks). The surface of WT RBD is depicted in grey. (D) Additional amino acid changes L335P, V341I, T345E, Y365F, Y369L, A372K (cyan sticks) likely stabilize the helices that contact the glycan in WT RBD.

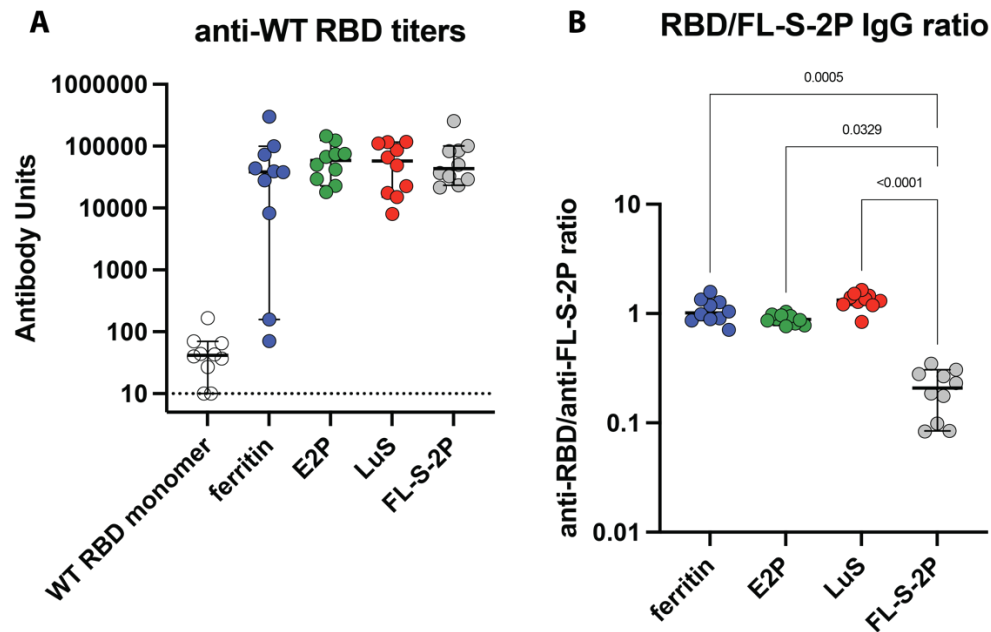

**Figure S3. noNAG particles focus the immune response to the RBD in mice.** (A) anti-WT RBD IgG titers in mice 14 days after a second immunization (day 35 in Figure 3A). Dashed line indicates detection limit of assay and bars represent median titers with 95% confidence interval. (B) Ratio of anti-WT RBD IgG titers to anti-FL-S-2P IgG titers at day 35, depicted as described for A. Statistical comparisons were made using a Kruskal-Wallis ANOVA followed by Dunn's comparison with FL-S-2P, corrected for multiple comparisons.

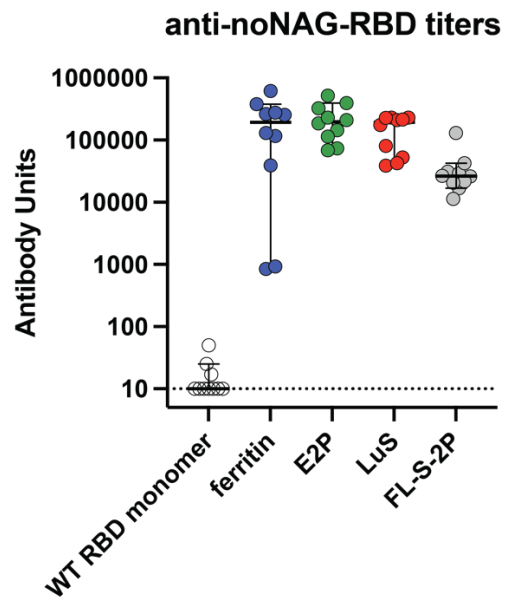

**Figure S4.** Anti-noNAG-RBD IgG titers in mice 14 days after a second immunization (day 35 in Figure 3A). Dashed line indicates detection limit of assay and bars represent median titers with 95% confidence interval.

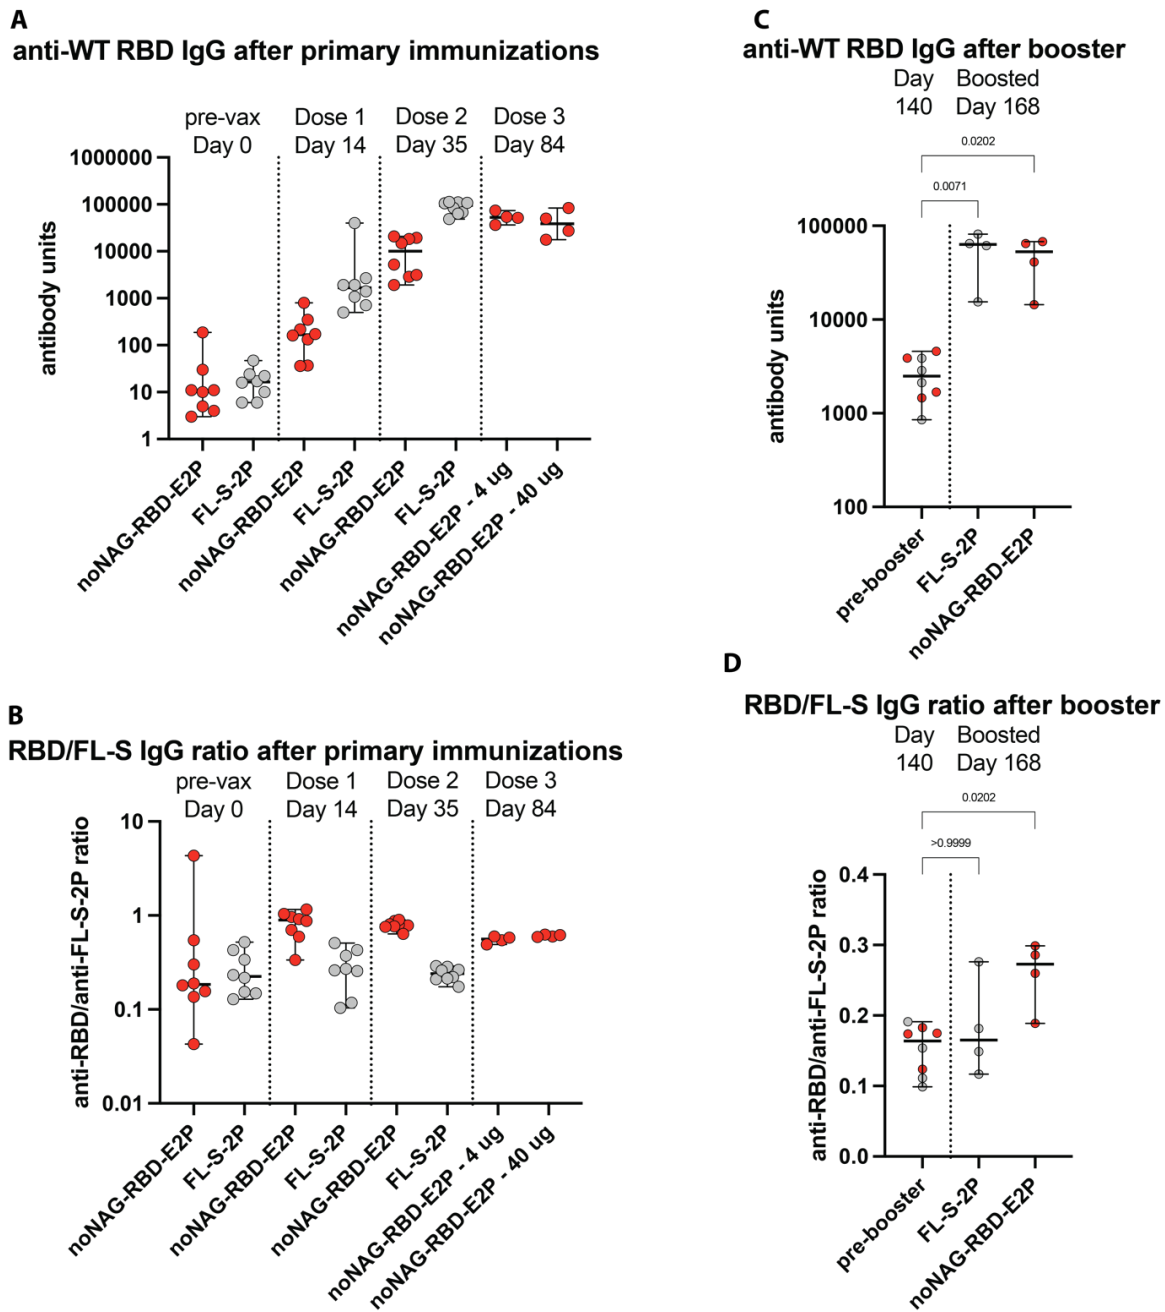

**Figure S5. Anti-WT RBD IgG titers in NHPs.** (A) anti-WT RBD IgG titers according to the immunization schedule in Figure 4A. Bars represent median titers with 95% confidence interval. (B) Ratio of anti-WT RBD IgG titers to anti-FL-S-2P IgG titers, depicted as described for A. (C) anti-WT RBD IgG titers before and after boosting, according to the immunization schedule in Figure 5A. Bars represent median titers with 95% confidence interval. Grey circles in the pre-booster sample are animals subsequently boosted with FL-S-2P and red circles were subsequently boosted with FL-S-2P. Statistical comparisons were made using a Kruskal-Wallis ANOVA followed by Dunn's comparison with the pre-booster group, corrected for multiple comparisons. (D) Ratio of anti-WT RBD IgG titers to anti-FL-S-2P IgG titers, depicted as described for C.

**A****anti-noNAG-RBD IgG after primary immunizations**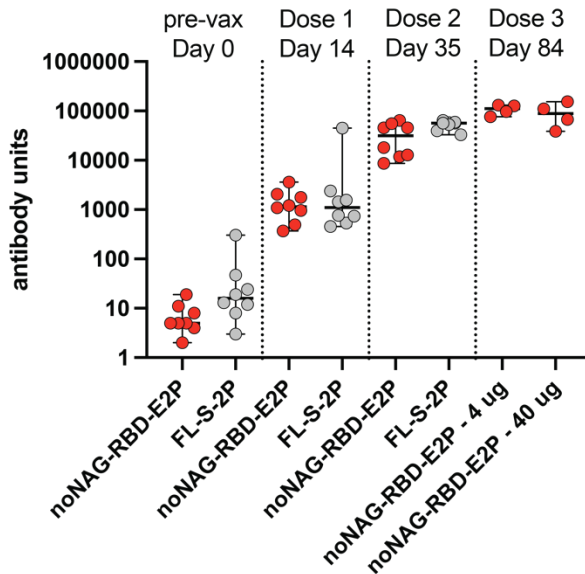**B anti-noNAG-RBD IgG after booster**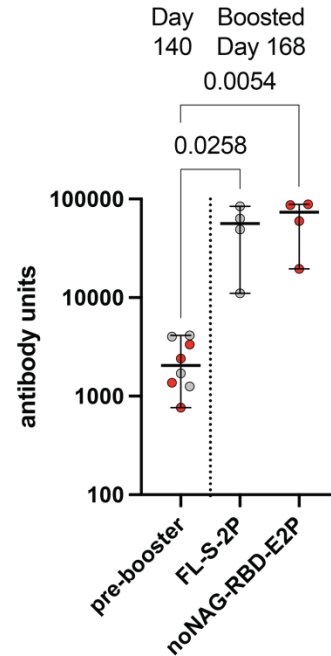

**Figure S6. Anti-noNAG-RBD IgG titers in NHPs.** (A) anti-noNAG-RBD IgG titers according to the immunization schedule in Figure 4A. Bars represent median titers with 95% confidence interval. (B) anti-noNAG-RBD IgG titers before and after boosting, according to the immunization schedule in Figure 5A. Bars represent median titers with 95% confidence interval. Grey circles in the pre-booster sample are animals subsequently boosted with FL-S-2P and red circles were subsequently boosted with FL-S-2P. Statistical comparisons were made using a Kruskal-Wallis ANOVA followed by Dunn's comparison with the pre-booster group, corrected for multiple comparisons.

**Table S1. NHP immunology data**

| Gro up # | Immunizations         | ani mal # | day | blocking ID50 - WA1 | blocking ID50 - Beta | blocking ID50 - Delta | PRNT 50 - WA1 | spike-binding IgG titer | Ab quality (PRNT50/IgG ratio) | FRNA WA1 ID50 | FRNA BA.5 ID50 |
|----------|-----------------------|-----------|-----|---------------------|----------------------|-----------------------|---------------|-------------------------|-------------------------------|---------------|----------------|
| 1b       | none                  | 2         | 0   |                     |                      |                       |               | 77                      |                               |               |                |
| 1b       | none                  | 5         | 0   |                     |                      |                       |               | 77                      |                               |               |                |
| 1a       | none                  | 6         | 0   |                     |                      |                       |               | 47                      |                               |               |                |
| 1b       | none                  | 7         | 0   |                     |                      |                       |               | 26                      |                               |               |                |
| 1a       | none                  | 8         | 0   |                     |                      |                       |               | 41                      |                               |               |                |
| 1b       | none                  | 9         | 0   |                     |                      |                       |               | 146                     |                               |               |                |
| 1a       | none                  | 12        | 0   |                     |                      |                       |               | 91                      |                               |               |                |
| 1a       | none                  | 14        | 0   |                     |                      |                       |               | 55                      |                               |               |                |
| 2        | none                  | 1         | 0   |                     |                      |                       |               | 36                      |                               |               |                |
| 2        | none                  | 3         | 0   |                     |                      |                       |               | 43                      |                               |               |                |
| 2        | none                  | 4         | 0   |                     |                      |                       |               | 54                      |                               |               |                |
| 2        | none                  | 10        | 0   |                     |                      |                       |               | 62                      |                               |               |                |
| 2        | none                  | 11        | 0   |                     |                      |                       |               | 59                      |                               |               |                |
| 2        | none                  | 13        | 0   |                     |                      |                       |               | 23                      |                               |               |                |
| 2        | none                  | 15        | 0   |                     |                      |                       |               | 33                      |                               |               |                |
| 2        | none                  | 16        | 0   |                     |                      |                       |               | 56                      |                               |               |                |
| 1b       | 1x 4 ug FL-S-2P       | 2         | 14  |                     |                      |                       |               | 5,280                   |                               |               |                |
| 1b       | 1x 4 ug FL-S-2P       | 5         | 14  |                     |                      |                       |               | 156,500                 |                               |               |                |
| 1a       | 1x 4 ug FL-S-2P       | 6         | 14  |                     |                      |                       |               | 4,480                   |                               |               |                |
| 1b       | 1x 4 ug FL-S-2P       | 7         | 14  |                     |                      |                       |               | 7,133                   |                               |               |                |
| 1a       | 1x 4 ug FL-S-2P       | 8         | 14  |                     |                      |                       |               | 4,230                   |                               |               |                |
| 1b       | 1x 4 ug FL-S-2P       | 9         | 14  |                     |                      |                       |               | 1,913                   |                               |               |                |
| 1a       | 1x 4 ug FL-S-2P       | 12        | 14  |                     |                      |                       |               | 4,133                   |                               |               |                |
| 1a       | 1x 4 ug FL-S-2P       | 14        | 14  |                     |                      |                       |               | 13,517                  |                               |               |                |
| 2        | 1x 4 ug noNAG-RBD-E2P | 1         | 14  |                     |                      |                       |               | 309                     |                               |               |                |
| 2        | 1x 4 ug noNAG-RBD-E2P | 3         | 14  |                     |                      |                       |               | 828                     |                               |               |                |
| 2        | 1x 4 ug noNAG-RBD-E2P | 4         | 14  |                     |                      |                       |               | 334                     |                               |               |                |
| 2        | 1x 4 ug noNAG-RBD-E2P | 10        | 14  |                     |                      |                       |               | 109                     |                               |               |                |
| 2        | 1x 4 ug noNAG-RBD-E2P | 11        | 14  |                     |                      |                       |               | 144                     |                               |               |                |
| 2        | 1x 4 ug noNAG-RBD-E2P | 13        | 14  |                     |                      |                       |               | 198                     |                               |               |                |



|    |                                |    |     |       |       |       |       |         |        |       |      |
|----|--------------------------------|----|-----|-------|-------|-------|-------|---------|--------|-------|------|
| 2  | 1x 4 ug noNAG-RBD-E2P          | 15 | 14  |       |       |       |       | 60      |        |       |      |
| 2  | 1x 4 ug noNAG-RBD-E2P          | 16 | 14  |       |       |       |       | 139     |        |       |      |
| 1b | 2x 4 ug FL-S-2P                | 2  | 35  | 735.9 | 135.5 | 658.6 | 1994  | 387,333 | 0.0019 | 1280  | 160  |
| 1b | 2x 4 ug FL-S-2P                | 5  | 35  | 1826  | 235.2 | 1719  | 10190 | 324,667 | 0.0056 | 10240 | 1280 |
| 1a | 2x 4 ug FL-S-2P                | 6  | 35  | 676.3 | 151.3 | 616   | 1534  | 366,667 | 0.0018 | 640   | 80   |
| 1b | 2x 4 ug FL-S-2P                | 7  | 35  | 1215  | 215.1 | 1174  | 3349  | 408,333 | 0.0030 | 1280  | 320  |
| 1a | 2x 4 ug FL-S-2P                | 8  | 35  | 748.4 | 175.3 | 623.6 | 1183  | 321,333 | 0.0023 | 640   | 40   |
| 1b | 2x 4 ug FL-S-2P                | 9  | 35  | 603.1 | 80.76 | 452.6 | 2334  | 220,333 | 0.0027 | 1280  | 160  |
| 1a | 2x 4 ug FL-S-2P                | 12 | 35  | 753.6 | 116.9 | 607.2 | 2859  | 365,333 | 0.0021 | 1280  | 80   |
| 1a | 2x 4 ug FL-S-2P                | 14 | 35  | 1178  | 267.9 | 1004  | 2725  | 531,667 | 0.0022 | 1280  | 40   |
| 2  | 2x 4 ug noNAG-RBD-E2P          | 1  | 35  | 20.8  | 9.416 | 19.92 |       | 3,667   | 0.0057 |       |      |
| 2  | 2x 4 ug noNAG-RBD-E2P          | 3  | 35  | 96.01 | 28.44 | 75.35 |       | 24,193  | 0.0040 |       |      |
| 2  | 2x 4 ug noNAG-RBD-E2P          | 4  | 35  | 108.1 | 24.92 | 81.85 |       | 28,650  | 0.0038 |       |      |
| 2  | 2x 4 ug noNAG-RBD-E2P          | 10 | 35  | 9.985 | 10    | 9.645 |       | 2,190   | 0.0046 |       |      |
| 2  | 2x 4 ug noNAG-RBD-E2P          | 11 | 35  | 66.02 | 8.673 | 36.91 |       | 18,580  | 0.0036 |       |      |
| 2  | 2x 4 ug noNAG-RBD-E2P          | 13 | 35  | 21.46 | 9.88  | 16.49 |       | 3,510   | 0.0061 |       |      |
| 2  | 2x 4 ug noNAG-RBD-E2P          | 15 | 35  | 24.66 | 9.512 | 16.77 |       | 6,840   | 0.0036 |       |      |
| 2  | 2x 4 ug noNAG-RBD-E2P          | 16 | 35  | 133.6 | 16.33 | 80.48 |       | 27,297  | 0.0049 |       |      |
| 2a | 2x 4 ug + 4 ug noNANG-RBD-E2P  | 1  | 84  | 655.3 | 68.81 | 347.4 | 1632  | 66,800  | 0.0098 | 1280  | 40   |
| 2b | 2x 4 ug + 40 ug noNANG-RBD-E2P | 3  | 84  | 767   | 175.5 | 476.9 | 2056  | 82,900  | 0.0093 | 2560  | 160  |
| 2a | 2x 4 ug + 4 ug noNANG-RBD-E2P  | 4  | 84  | 864.8 | 269   | 362.2 | 3181  | 126,567 | 0.0068 | 1280  | 80   |
| 2b | 2x 4 ug + 40 ug noNANG-RBD-E2P | 10 | 84  | 227.6 | 30.32 | 134.8 | 438.8 | 28,567  | 0.0080 | 320   | 20   |
| 2a | 2x 4 ug + 4 ug noNANG-RBD-E2P  | 11 | 84  | 1039  | 170.5 | 586.8 | 2134  | 90,600  | 0.0115 | 1280  | 40   |
| 2b | 2x 4 ug + 40 ug noNANG-RBD-E2P | 13 | 84  | 583.4 | 180.8 | 343.2 | 360.8 | 43,933  | 0.0133 | 640   | 40   |
| 2a | 2x 4 ug + 4 ug noNANG-RBD-E2P  | 15 | 84  | 1067  | 303.9 | 692.7 | 1072  | 104,533 | 0.0102 | 640   | 160  |
| 2b | 2x 4 ug + 40 ug noNANG-RBD-E2P | 16 | 84  | 950.5 | 236.5 | 588.4 | 2251  | 140,833 | 0.0067 | 1280  | 160  |
| 1b | 2x 4 ug FL-S-2P                | 2  | 140 | 406.7 | 182.1 | 439.2 |       | 25,133  | 0.0162 |       |      |
| 1b | 2x 4 ug FL-S-2P                | 5  | 140 | 303.6 | 79.84 | 382.5 |       | 22,367  | 0.0136 |       |      |
| 1a | 2x 4 ug FL-S-2P                | 6  | 140 | 262   | 123.8 | 344   |       | 14,967  | 0.0175 |       |      |
| 1b | 2x 4 ug FL-S-2P                | 7  | 140 | 326   | 136.6 | 412.1 |       | 11,800  | 0.0276 |       |      |
| 1a | 2x 4 ug FL-S-2P                | 8  | 140 | 150.5 | 47.45 | 158.5 |       | 7,667   | 0.0196 |       |      |
| 1b | 2x 4 ug FL-S-2P                | 9  | 140 | 162.6 | 54.39 | 154.6 |       | 9,633   | 0.0169 |       |      |

|    |                                            |    |     |       |       |       |       |         |        |       |      |
|----|--------------------------------------------|----|-----|-------|-------|-------|-------|---------|--------|-------|------|
| 1a | 2x 4 ug FL-S-2P                            | 12 | 140 | 480.4 | 168.1 | 420.5 |       | 13,800  | 0.0348 |       |      |
| 1a | 2x 4 ug FL-S-2P                            | 14 | 140 | 348.9 | 141.5 | 271.8 |       | 39,067  | 0.0089 |       |      |
| 1b | 2x 4 ug FL-S-2P + 4 ug noNAG-RBD-E2P boost | 2  | 168 | 4436  | 1475  | 4643  | 8538  | 158,333 | 0.0280 | 5120  | 1280 |
| 1b | 2x 4 ug FL-S-2P + 4 ug noNAG-RBD-E2P boost | 5  | 168 | 2668  | 761   | 3175  | 6203  | 216,333 | 0.0123 | 2560  | 320  |
| 1a | 2x 4 ug FL-S-2P + 4 ug FL-S-2P boost       | 6  | 168 | 4574  | 1475  | 6833  | 6804  | 325,667 | 0.0140 | 2560  | 320  |
| 1b | 2x 4 ug FL-S-2P + 4 ug noNAG-RBD-E2P boost | 7  | 168 | 5264  | 2085  | 7692  | 15863 | 237,667 | 0.0221 | 10240 | 2560 |
| 1a | 2x 4 ug FL-S-2P + 4 ug FL-S-2P boost       | 8  | 168 | 6610  | 2169  | 8322  | 23854 | 547,000 | 0.0121 | 20480 | 5120 |
| 1b | 2x 4 ug FL-S-2P + 4 ug noNAG-RBD-E2P boost | 9  | 168 | 1794  | 606.8 | 3272  | 2538  | 52,333  | 0.0343 | 1280  | 160  |
| 1a | 2x 4 ug FL-S-2P + 4 ug FL-S-2P boost       | 12 | 168 | 3861  | 1933  | 6702  | 13407 | 132,333 | 0.0292 | 10240 | 1280 |
| 1a | 2x 4 ug FL-S-2P + 4 ug FL-S-2P boost       | 14 | 168 | 4245  | 1841  | 5032  | 10709 | 356,333 | 0.0119 | 10240 | 5120 |

**Table S2. NHP history**

| Group # | immunizations                              | animal # | Sex | Age | Weight (kg) | History                                                                |
|---------|--------------------------------------------|----------|-----|-----|-------------|------------------------------------------------------------------------|
| 1a      | 2x 4 ug FL-S-2P + 4 ug FL-S-2P boost       | 6        | M   | 7   | 7.62        | 10/2016 inoculated w/Leishmania major; 12/2020 inoculated w/ VSV-ZEBOV |
| 1a      | 2x 4 ug FL-S-2P + 4 ug FL-S-2P boost       | 8        | M   | 7   | 7.49        | 10/2016 inoculated w/Leishmania major                                  |
| 1a      | 2x 4 ug FL-S-2P + 4 ug FL-S-2P boost       | 12       | M   | 5   | 13.55       | inoculated w/Malaria & zika Pfs2301M-EPA/LS130                         |
| 1a      | 2x 4 ug FL-S-2P + 4 ug FL-S-2P boost       | 14       | M   | 7   | 8.52        | 10/2016 inoculated w/Leishmania major; 12/2020 inoculated w/ VSV-ZEBOV |
| 1b      | 2x 4 ug FL-S-2P + 4 ug noNAG-RBD-E2P boost | 2        | M   | 7   | 8.66        | 10/2016 inoculated w/Leishmania major; 12/2020 inoculated w/ VSV-ZEBOV |
| 1b      | 2x 4 ug FL-S-2P + 4 ug noNAG-RBD-E2P boost | 5        | M   | 7   | 8.74        | 10/2016 inoculated w/Leishmania major                                  |
| 1b      | 2x 4 ug FL-S-2P + 4 ug noNAG-RBD-E2P boost | 7        | M   | 7   | 8.45        | 10/2016 inoculated w/Leishmania major; 12/2020 inoculated w/ VSV-ZEBOV |
| 1b      | 2x 4 ug FL-S-2P + 4 ug noNAG-RBD-E2P boost | 9        | M   | 9   | 11.65       | inoculated w/CMV & Epstein barr                                        |
| 2a      | 2x 4 ug + 4 ug noNANG-RBD-E2P              | 1        | M   | 7   | 8.72        | 10/2016 inoculated w/Leishmania major; 12/2020 inoculated w/ VSV-ZEBOV |
| 2a      | 2x 4 ug + 4 ug noNANG-RBD-E2P              | 4        | M   | 7   | 7.71        | 10/2016 inoculated w/Leishmania major; 12/2020 inoculated w/ VSV-ZEBOV |
| 2a      | 2x 4 ug + 4 ug noNANG-RBD-E2P              | 11       | M   | 6   | 12.88       | inoculated w/Malaria & zika Pfs2301M-EPA/LS130                         |
| 2a      | 2x 4 ug + 4 ug noNANG-RBD-E2P              | 15       | M   | 7   | 9.77        | 10/2016 inoculated w/Leishmania major                                  |
| 2b      | 2x 4 ug + 40 ug noNANG-RBD-E2P             | 3        | M   | 7   | 8.16        | 10/2016 inoculated w/Leishmania major; 12/2020 inoculated w/ VSV-ZEBOV |
| 2b      | 2x 4 ug + 40 ug noNANG-RBD-E2P             | 10       | M   | 6   | 11.7        | inoculated w/Malaria Pfs230D1M-EPA-                                    |
| 2b      | 2x 4 ug + 40 ug noNANG-RBD-E2P             | 13       | M   | 7   | 9.09        | 10/2016 inoculated w/Leishmania major; 12/2020 inoculated w/ VSV-ZEBOV |
| 2b      | 2x 4 ug + 40 ug noNANG-RBD-E2P             | 16       | M   | 7   | 10.39       | 10/2016 inoculated w/Leishmania major                                  |
